# Supplementary material for: Composition, Abundance, and Diversity of the Soil Microbiome Associated with the Halophytic Plants Tamarix aphylla and Halopeplis perfoliata on Jeddah Seacoast, Saudi Arabia
Source: MDPI journal article supplement (doi:10.3390/plants12112176), 2023-05-30
Supplement: s1 [file s1]

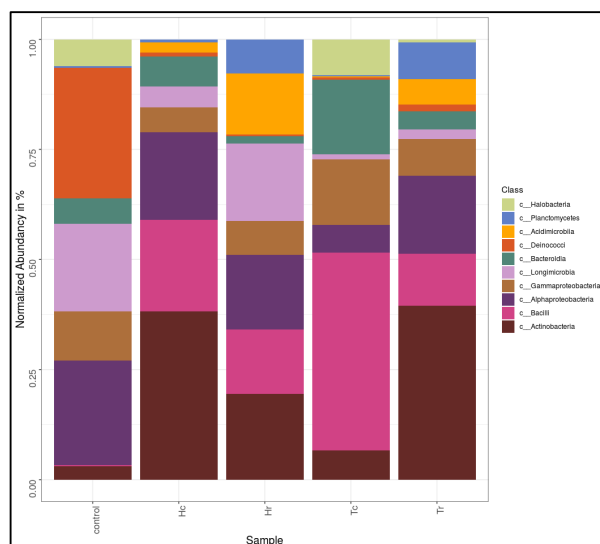

**Figure S1.** The abundance rates of the most prevalent class of bacterial communities in soil samples.

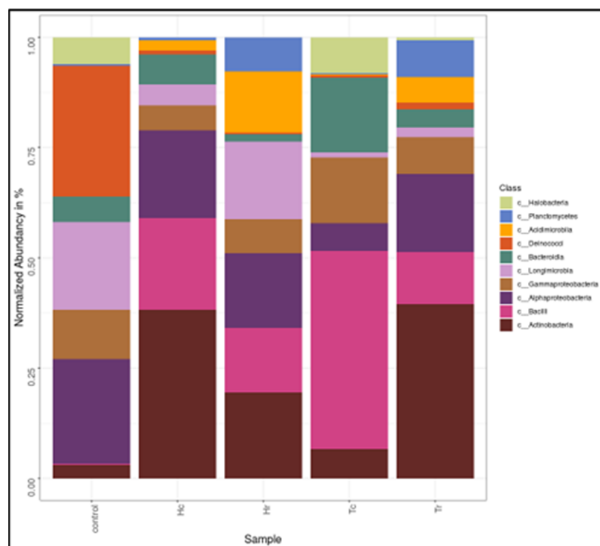

**Figure S2.** The abundance rates of the most prevalent order of bacterial communities in soil samples.

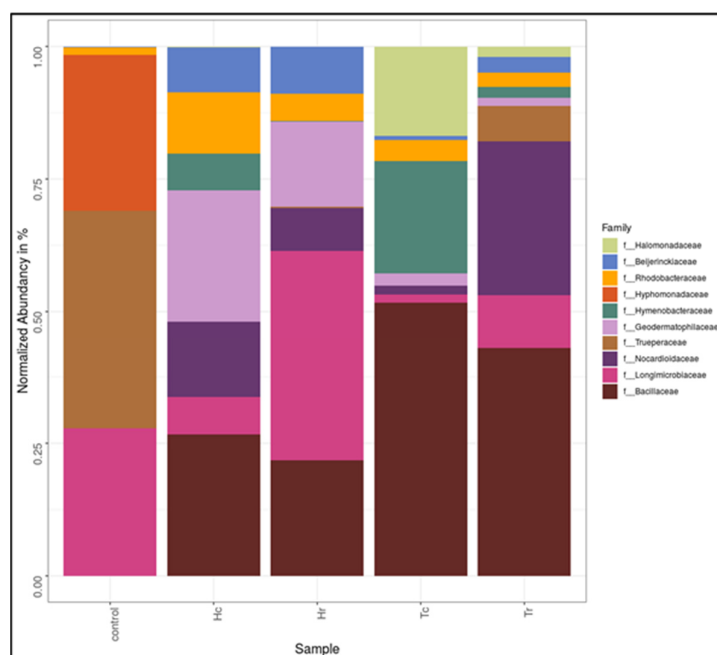

**Figure S3.** The abundance rates of dominant family of bacterial communities among the soil samples.

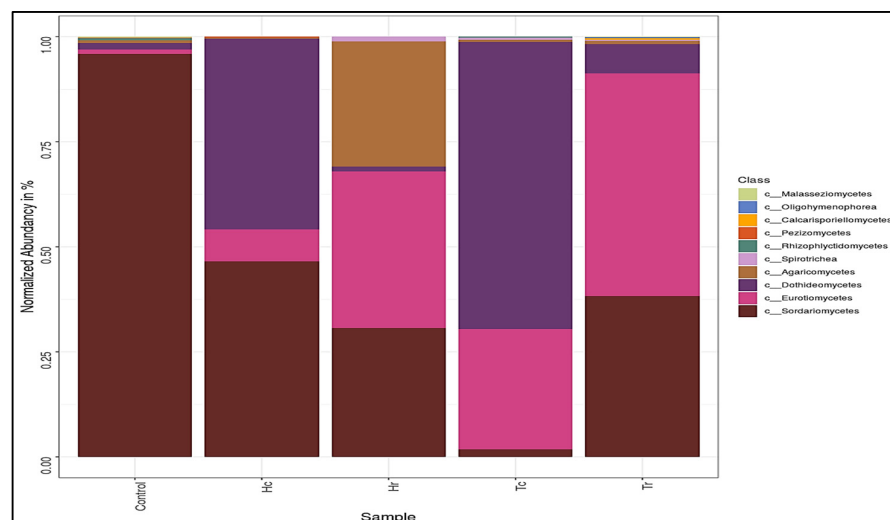

**Figure S4.** Fungal communities within each sample based on respective class.

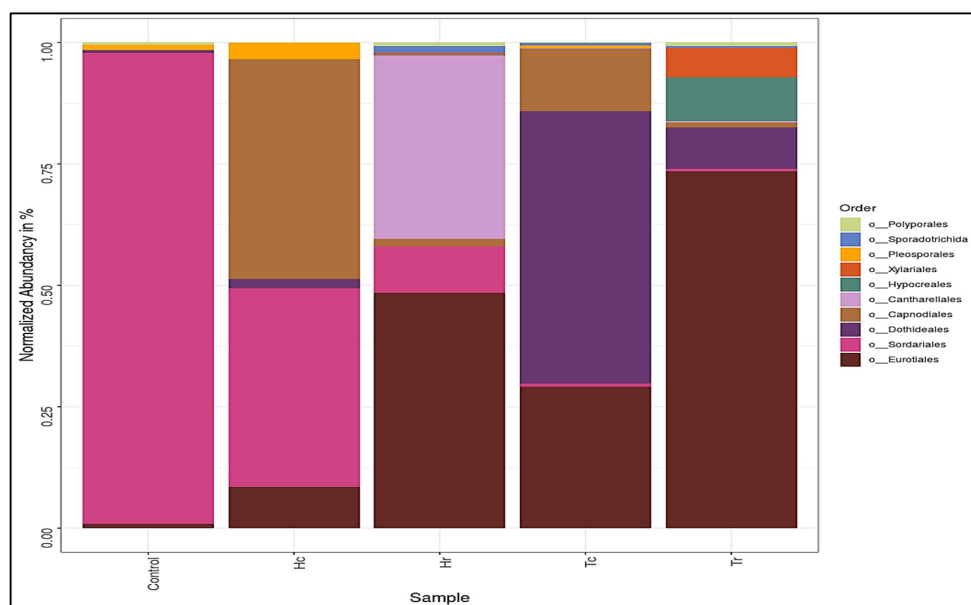

**Figure S5.** Fungal communities within each sample based on respective order.

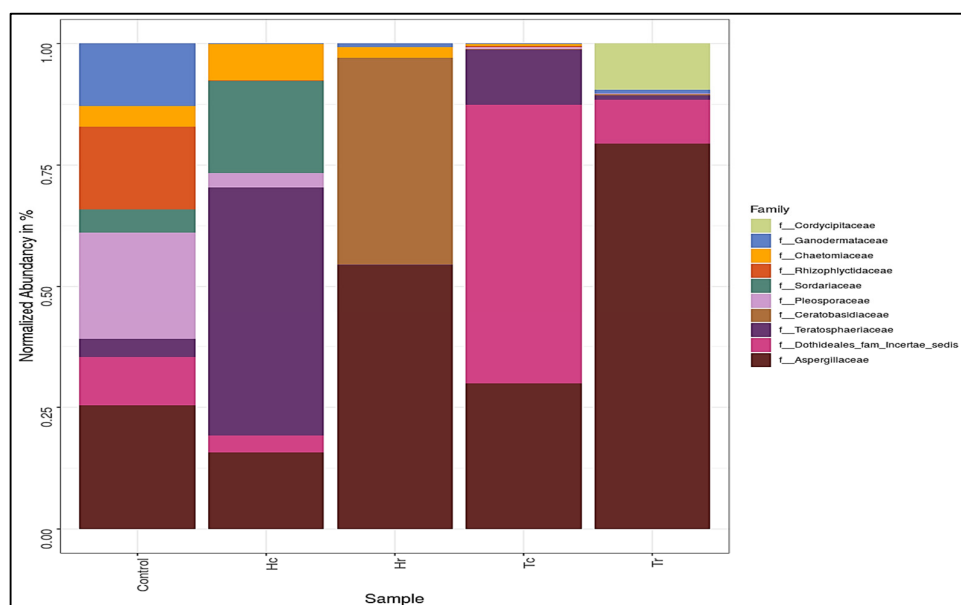

**Figure S6.** Fungal communities within each sample based on respective family.

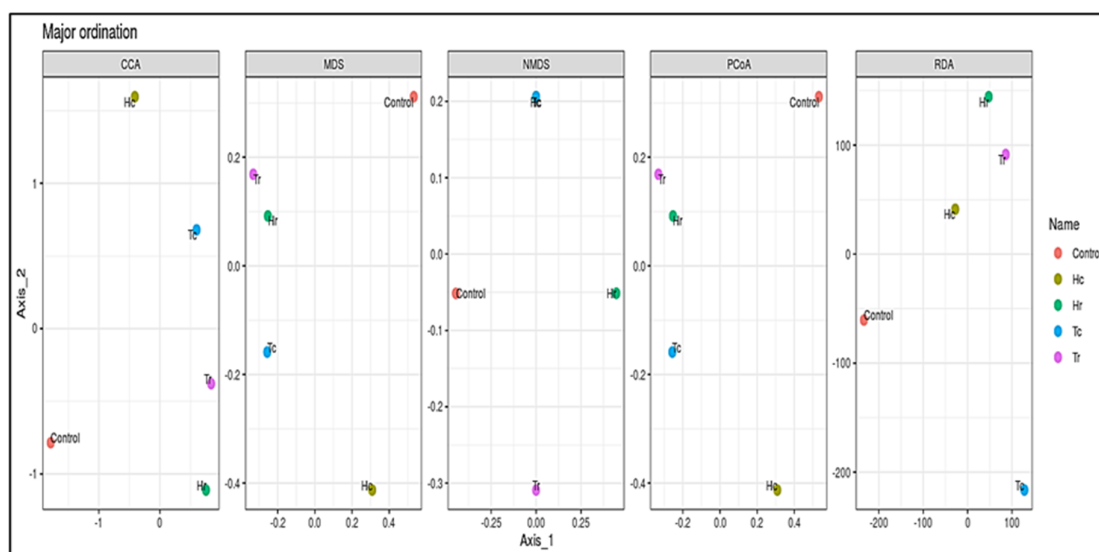

**Figure S7.** Box plots of beta-diversity indices of fungal community richness and composition according to CCA, MDS, NMDS, PCoA, and RDA analysis methods among the samples. Control: Control sample; (Hc): *H. perfoliata* crust sample; (Hr): *H. perfoliata* rhizosphere sample; (Tc): *T. aphylla* crust sample; (Tr): *T. aphylla* rhizosphere sample.
